# Supplementary material for: Protecting the properties of monolayer MoS2 on silicon based substrates with an atomically thin buffer
Source: PubMed Central journal article supplement (PMC4751437; doi:10.1038/srep20890), 2016-02-12
Supplement: srep20890-s1.pdf [file srep20890-s1.pdf]

# Protecting the properties of monolayer MoS<sub>2</sub> on silicon based substrates with an atomically thin buffer

*Michael K.L. Man<sup>\*1</sup>, Skylar Deckoff-Jones<sup>1</sup>, A. Winchester<sup>1</sup>, Guangsha Shi<sup>2</sup>, Gautam Gupta<sup>3</sup>,  
Aditya Mohite<sup>3</sup>, Swastik Kar<sup>4</sup>, Emmanouil Kioupakis<sup>2</sup>, Saikat Talapatra<sup>1,5</sup>, K.M. Dani<sup>1</sup>*

<sup>1</sup> Femtosecond Spectroscopy Unit, Okinawa Inst. of Science & Technology, Graduate University,  
1919-1 Tancha, Onna-son, Kunigami-gun, Okinawa, 904-0495 Japan.

<sup>2</sup> Department of Materials Science and Engineering, University of Michigan, 2106 H. H. Dow  
Bldg., 2300 Hayward St., Ann Arbor, MI 48109, United States

<sup>3</sup> Material Synthesis and Integrated Devices, MPA-11, Los Alamos National Laboratory, Los  
Alamos, NM 87545, USA

<sup>4</sup> Department of Physics, Northeastern University, Boston, Massachusetts 02115, United States

<sup>5</sup> Department of Physics, Southern Illinois University Carbondale, Carbondale, Illinois 62901,  
United States

## Supplementary Information

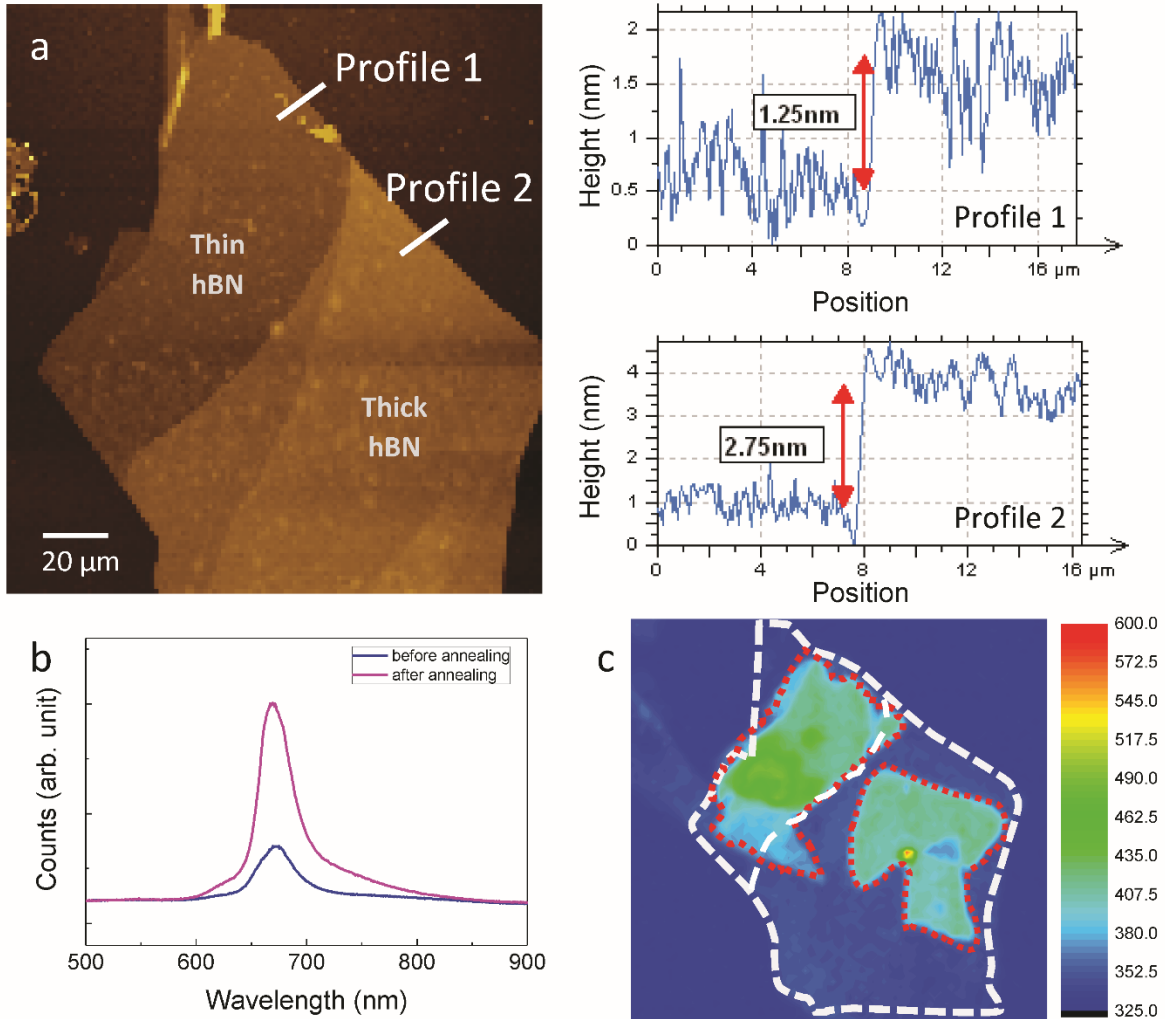

**Supplementary Figure S1 | PL measurements for monolayer MoS<sub>2</sub> on top of an hBN buffer layer.** **a**, AFM image of an hBN flake on top of a SiO<sub>2</sub> substrate. The line profile on the right shows that the thickness of hBN varied from 1.25nm to 2.75nm. **b**, shows the PL signal from monolayer MoS<sub>2</sub> flakes before and after the annealing-cleaning process. It shows that there is at least a 5x enhancement in the PL signal strength as a result of the annealing-cleaning process. **c**, shows a PL map of the MoS<sub>2</sub>/hBN/SiO<sub>2</sub> heterostructure with monolayer MoS<sub>2</sub> (outlined in red) on top of the hBN flake (outlined in white). The thinner part of the hBN (top-left) is separated from the thicker part (bottom-right) by an extra dotted line in between. It shows that the PL signal strength for MoS<sub>2</sub> on hBN of different thickness is comparable, with MoS<sub>2</sub> on thinner hBN giving a slightly stronger signal, possibly due to interference effects.

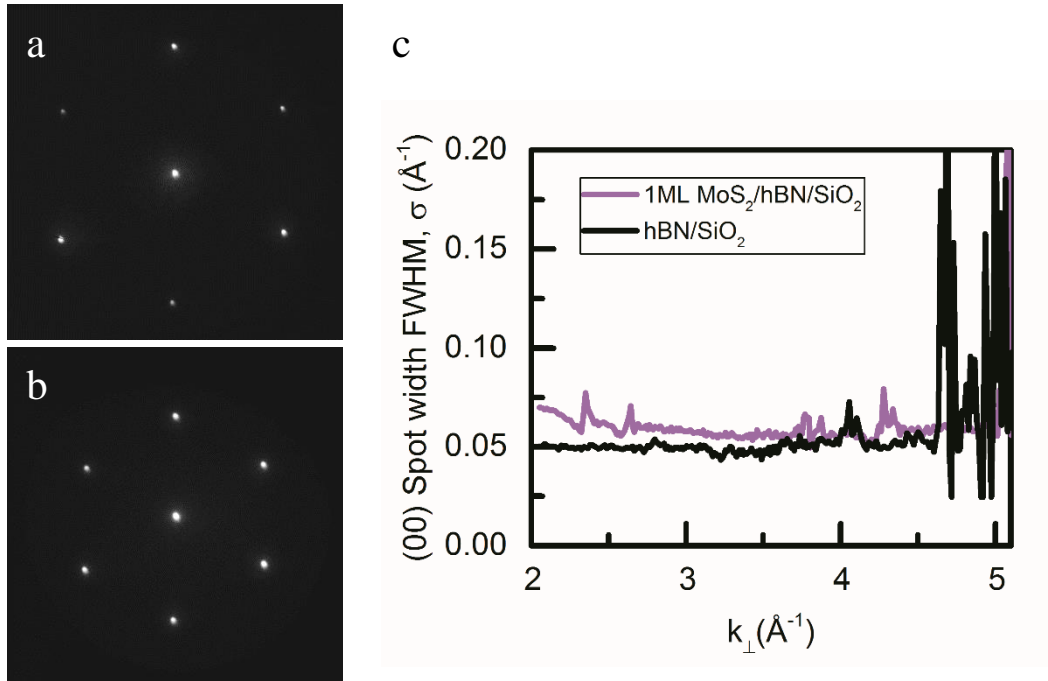

**Supplementary Figure S2 | Flat hBN buffer on SiO<sub>2</sub>.** Sharp  $\mu$ -LEED patterns are taken from **a**, hBN region as thin as  $\sim 1$  nm and **b**, monolayer MoS<sub>2</sub> on top of the thin hBN (electron energy at 50 eV). **c**, FWHM of the specular (00) diffraction beam –  $\sigma$ , versus incident electron wave vector  $k_{\perp}$  shows that both thin hBN and the MoS<sub>2</sub> on top are extremely flat. Thus, even atomically thin hBN on SiO<sub>2</sub>/Si is able to provide a stable flat platform for an overlaying monolayer crystal.
